# Supplementary material for: The ribonucleotidyl transferase USIP-1 acts with SART3 to promote U6 snRNA recycling
Source: PubMed Central journal article supplement (PMC4381082; doi:10.1093/nar/gkv196), 2015-03-09
Supplement: supp_gkv196_nar-02990-a-2014-File009.pdf [file supp_gkv196_nar-02990-a-2014-File009.pdf]

## **SUPPLEMENTARY FIGURES AND TABLES**

**S. Rügger et al. The Ribonucleotidyl Transferase USIP-1 Acts with SART3 to Promote U6 snRNA Recycling. Nucleic Acids Res (2015)**

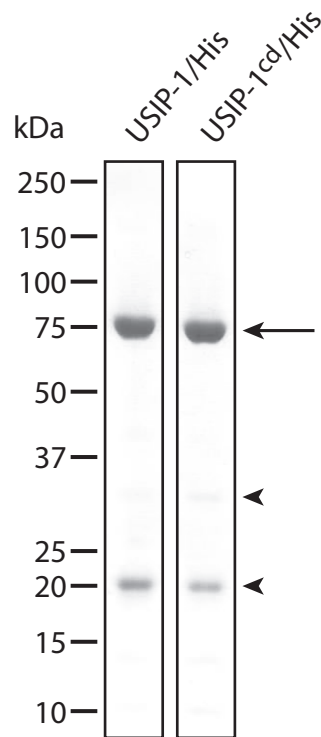

**Figure S1.** Purity of recombinant USIP-1. Coomassie staining of recombinant USIP-1 and USIP-1cd purified through a C-terminal His-Tag using a HisTrap column. An arrow points to USIP-1, which has a calculated mass of 75 kDa; arrowheads point to residual contaminations.

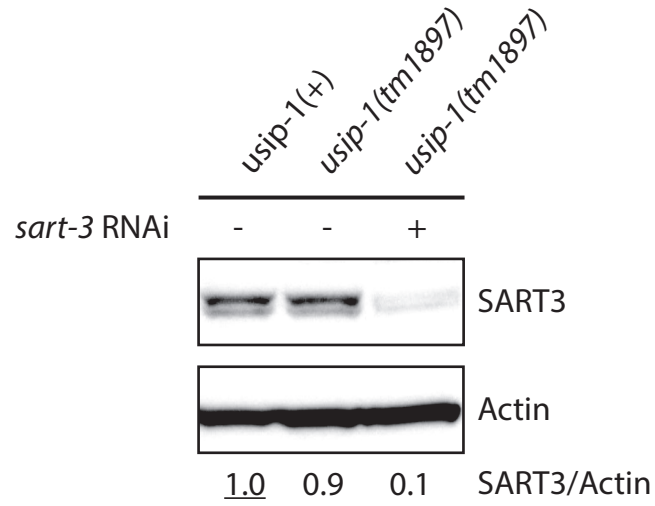

**Figure S2.** Knock-down efficiency of *sart-3*.

Western blot of lysates obtained from wild-type worms (*usip-1(+)*) exposed to mock RNAi (lane 1), *usip-1(tm1897)* worms exposed to mock RNAi (lane 2), and *usip-1(tm1897)* worms exposed to *sart-3* RNAi (lane 3). Quantification of band signals is relative to the underlined value, which has been set to 1.

Figure S3

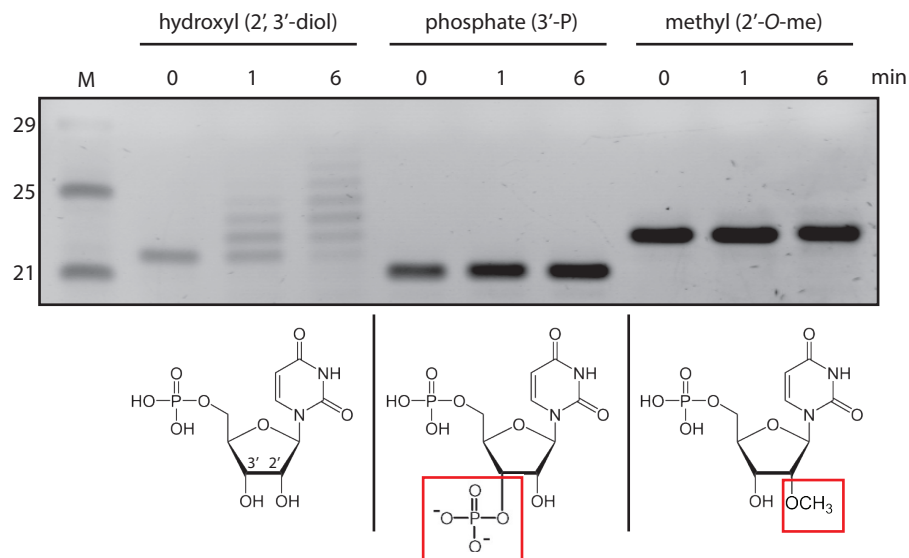

**Figure S3.** Activity of USIP-1 on different RNA 3' ends.

Transferase assay (see methods) adding recombinant USIP-1 to a synthetic 22-nucleotide-long RNA substrate containing a uridine at the 3' end that is either unmodified (2',3'-diol), 3'-monophosphorylated (3'-P), or 2'-O-methylated (2'-O-me). Note that the 2'-O-methylated substrate is 23 (not 22) nucleotides long containing an additional uridine at the 3' end. Shown is a SYBR Gold staining of a 15% urea-polyacrylamide gel (inverted picture). M = Marker

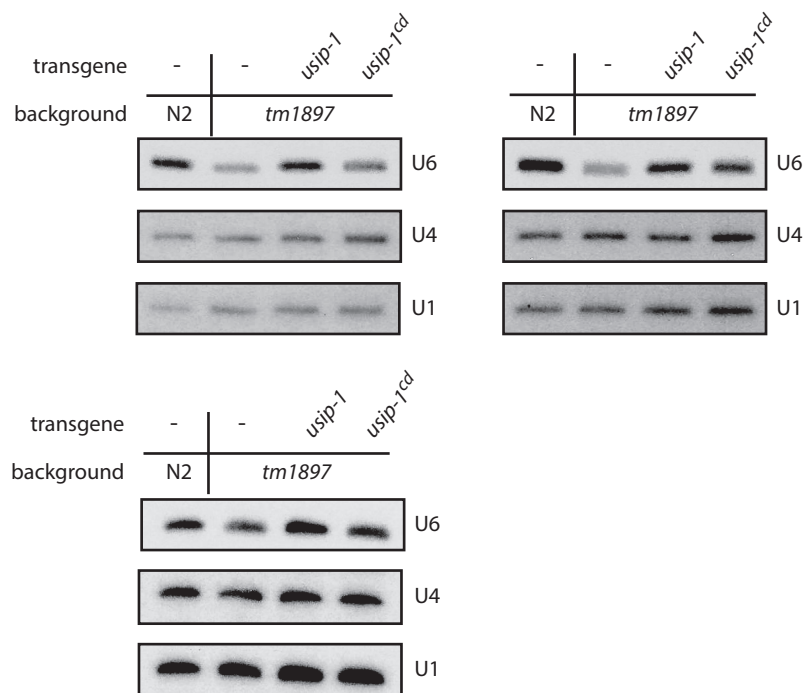

**Figure S4.** Replicate 2-4 of Northern blot shown in figure 6A.

**Table S1. Coverage in percent of protein sequence of indicated proteins in IP1 and IP2 shown in figure 2B.**

| <b>IP1</b> |            |     |              |     | <b>IP2</b> |            |     |              |     |
|------------|------------|-----|--------------|-----|------------|------------|-----|--------------|-----|
| RNase A    | FLAG/SART3 |     | GFP/His/FLAG |     | RNase A    | FLAG/SART3 |     | GFP/His/FLAG |     |
|            | no         | yes | no           | yes |            | no         | yes | no           | yes |
| SART3      | 57         | 50  | 0            | 0   | SART3      | 53         | 53  | 0            | 0   |
| GFP        | 0          | 0   | 58           | 46  | GFP        | 0          | 0   | 78           | 75  |
| GUT-2      | 80         | 0   | 0            | 0   | GUT-2      | 60         | 0   | 0            | 0   |
| LSM-3      | 75         | 0   | 0            | 0   | LSM-3      | 71         | 0   | 0            | 0   |
| LSM-4      | 28         | 0   | 0            | 0   | LSM-4      | 41         | 0   | 0            | 0   |
| LSM-5      | 87         | 0   | 0            | 0   | LSM-5      | 21         | 0   | 0            | 0   |
| LSM-6      | 36         | 0   | 0            | 0   | LSM-6      | 60         | 0   | 0            | 0   |
| LSM-7      | 33         | 0   | 0            | 0   | LSM-7      | 19         | 0   | 0            | 0   |
| LSM-8      | 84         | 0   | 0            | 0   | LSM-8      | 72         | 0   | 0            | 0   |
| SNR-1      | 50         | 0   | 0            | 0   | SNR-1      | 51         | 0   | 0            | 0   |
| SNR-2      | 33         | 0   | 0            | 0   | SNR-2      | 0          | 0   | 0            | 0   |
| SNR-3      | 25         | 0   | 0            | 0   | SNR-3      | 42         | 0   | 0            | 0   |
| SNR-4      | 59         | 0   | 0            | 0   | SNR-4      | 56         | 0   | 0            | 26  |
| SNR-5      | 42         | 0   | 0            | 0   | SNR-5      | 48         | 0   | 0            | 0   |
| SNR-7      | 61         | 0   | 0            | 0   | SNR-7      | 53         | 40  | 0            | 0   |
| USIP-1     | 19         | 0   | 0            | 0   | USIP-1     | 33         | 0   | 0            | 0   |

|                    | IP1  |     | IP2  |      |
|--------------------|------|-----|------|------|
|                    | LSM  | SNR | LSM  | SNR  |
| average % coverage | 60.4 | 45  | 49.1 | 41.7 |

**Table S2. Additional proteins bound to USIP-1 and SART3.**

Additional proteins identified by mass spectrometry in the co-IP shown in figure 3B enriched by  $\geq 10$ -fold in either the USIP-1 or SART3 IP over the GFP/His/FLAG negative control. Table is ranked according to the USIP-1/GFP ratio. The numbers in the table indicate the quantity of spectra mapping uniquely to a given protein.

| <i>C. elegans</i> | <i>H. sapiens</i> | <i>S. cerevisiae</i> | GFP/His/FLAG | USIP-1/GFP/3xFLAG | FLAG/SART3 |
|-------------------|-------------------|----------------------|--------------|-------------------|------------|
| swn-1             | SMARCC1           | SWI3                 | 0            | 28                | 8          |
| atp-2             | ATP5B             | ATP2                 | 0            | 25                | 8          |
| pde-6             | PDE8A             | PDE2                 | 0            | 24                | 6          |
| hsp-6             | HSPA9             | SSC1                 | 0            | 21                | 9          |
| rpl-34            | RPL34             | RPL34B               | 0            | 18                | 11         |
| rpn-2             | PSMD1             | RPN2                 | 0            | 18                | 5          |
| rpl-9             | RPL9              | RPL9B                | 0            | 17                | 11         |
| rpn-3             | PSMD3             | RPN3                 | 0            | 16                | 9          |
| sip-1             | CRYAB             |                      | 0            | 16                | 0          |
| rpl-26            | RPL26             | RPL26B               | 0            | 14                | 11         |
| rpl-19            | RPL19             | RPL19A               | 0            | 14                | 5          |
| rpl-32            | RPL32             | RPL32                | 0            | 13                | 9          |
| atp-4             | ATP5J             |                      | 0            | 12                | 8          |
| cct-5             | CCT5              | CCT5                 | 0            | 12                | 5          |
| copb-2            | COPB2             | SEC27                | 0            | 12                | 0          |
| eef-2             | EEF2              | EFT1                 | 0            | 11                | 6          |
| nap-1             | NAP1L1            | NAP1                 | 0            | 11                | 5          |
| dlst-1            | DLST              | KGD2                 | 0            | 11                | 5          |
| rpn-8             | PSMD7             | RPN8                 | 0            | 11                | 5          |
| F18C12.3          | SRFBP1            | USO1                 | 0            | 11                | 4          |
| cpsf-1            | CPSF1             | CFT1                 | 0            | 11                | 2          |
| copa-1            | COPA              | COP1                 | 0            | 11                | 0          |
| rpl-28            | RPL28             |                      | 0            | 10                | 8          |
| pas-4             | PSMA7             | PRE6                 | 0            | 10                | 5          |
| cgh-1             | DDX6              | DHH1                 | 0            | 10                | 3          |
| cey-1             | YBX3              | NOP1                 | 0            | 6                 | 10         |

**Table S3. Worm strains**

| strain name          | genotype                                                                                                | comment                                        |
|----------------------|---------------------------------------------------------------------------------------------------------|------------------------------------------------|
|                      |                                                                                                         |                                                |
| <b>gfp control</b>   |                                                                                                         |                                                |
| HW781                | EG5003, xeSi17[Pxrn-2::gfp::his::flag::xrn-2 3', unc-119(+)] IV                                         |                                                |
|                      |                                                                                                         |                                                |
|                      |                                                                                                         |                                                |
| <b>sart-3 lines*</b> |                                                                                                         |                                                |
| HW1008               | EG6701, xeSi55[Pdpy-30::sart-3::gfp::his::flag::xrn-2 3', unc-119(+)] I                                 |                                                |
| HW1337               | sart-3(xe3)/nT1[qIs51] IV                                                                               |                                                |
| HW1338               | HW1008; sart-3(xe3) IV                                                                                  |                                                |
| HW1339               | EG6699, xeSi126[Pdpy-30::flag::sart-3::gpd-operon::gfp::his-58::tbb-2 3', unc-119(+)] II                |                                                |
| HW1340               | EG6699, xeEx386(WRM0622D_C09::gfp::3xflag; Pmyo-2::mCherry)                                             | gfp::3xflag tagged B0035.12 (sart-3) on fosmid |
| HW1341               | HW1339; sart-3(xe3)/nT1[qIs51] IV                                                                       |                                                |
| HW1350               | unc-119(ed3) III; ttTi5820 IV                                                                           |                                                |
|                      |                                                                                                         |                                                |
| <b>usip-1 lines*</b> |                                                                                                         |                                                |
| HW1251               | ZK863.4(tm1897) V                                                                                       |                                                |
| HW1342               | EG6699, xeEx387(WRM0610A_C05::gfp::3xflag)                                                              | gfp::3xflag tagged ZK863.4 (usip-1) on fosmid  |
| HW1343               | EG6699, xeSi127[Pdpy-30::ZK863.4::flag::gpd-operon::gfp::his-58::tbb-2 3'), unc-119(+)] II              |                                                |
| HW1344               | EG6699, xeSi128[Pdpy-30::ZK863.4(D183A/D185A)::flag::gpd-operon::gfp::his-58::tbb-2 3'), unc-119(+)] II |                                                |
| HW1345               | HW1343; ZK863.4(tm1897) V                                                                               |                                                |
| HW1346               | HW1344; ZK863.4(tm1897) V                                                                               |                                                |



**Table S4. Oligonucleotide primer & northern probe sequences**

Lower case letters = gateway recombination sites

| Cloning                                     | Forward (5'->3')                                                                | Reverse (5'->3')                                           |
|---------------------------------------------|---------------------------------------------------------------------------------|------------------------------------------------------------|
| sart-3 (genomic DNA)                        | ggggacaagtttgtaaaaaagcaggcttgATGT<br>CCGATGTGGATATGG                            | ggggaccactttgtacaagaaagctgggtgA<br>TTTTTCATAAACATTTTACGG   |
| flag::sart-3 (genomic DNA)                  | ggggacaagtttgtaaaaaagcaggctgcATG<br>GATTATAAAGATGATGATGACAAGTCCG<br>ATGTGGATATG | ggggaccactttgtacaagaaagctgggtgT<br>TAATTTTTTCATAAACATTTTAC |
| usip-1 (genomic DNA)                        | ggggacaagtttgtaaaaaagcaggcttgATGT<br>CTTCAAACCTGCAACTGG                         | ggggaccactttgtacaagaaagctgggtgT<br>TATGGCCAAGTTGGGGCTGC    |
| <b>Genotyping</b>                           |                                                                                 |                                                            |
| tm1897                                      | CGCCTCCGTGCGCACTTGAG                                                            | GTTATGCTGTGAAAACAAGC                                       |
| <b>Site-directed mutagenesis</b>            |                                                                                 |                                                            |
| usip-1(D183A) (on genomic DNA)              | GGCGAAATGGTTACTCAGCGATTGTAAG<br>TTGTTAG                                         | CTAACAACTTACAATCGCTGAGTAA<br>CCATTTCCGC                    |
| usip-1(D185A) (on genomic DNA)              | CAATAATGTTTTTAGGCGATTAACGTGG<br>AATCAG                                          | CTGATTCCACGTTAATCGCCTAAAA<br>ACATTATTG                     |
| usip-1 amplicon 1 (on cDNA, Gibson cloning) | GGCTTCTGGCGTGTGACCGGCGGCTCTA<br>GAGCCTCTGCTAACC                                 | CTGATTCCACGTTAATCGCAATCGC<br>TGAGTAACCATTTTCG              |
| usip-1 amplicon 2 (on cDNA, Gibson cloning) | CGAAATGGTTACTCAGCGATTGCGATTA<br>ACGTGGAATCAG                                    | CGAAATATTATGAGTAATATCCATG<br>GGATCCATCAACATCAACGGAG        |
| <b>MosDEL</b>                               |                                                                                 |                                                            |
| left homology region                        | ggggacaactttgtatagaaaagttggcCGAACC<br>ATCTGAGTACGTGC                            | ggggactgctttttgtacaaactgcGCTC<br>AAAAATGTGTTGCTTCTGG       |
| right homology region                       | ggggacagcttctgtacaaagttggcCTTGACG<br>AATTTTGATGGAAAC                            | ggggacaactttgtataataaagttgcGAA<br>GCTTTCCTACAAAGAGC        |
| xe3 5' end insertion                        | CGTCCTCACTTTCTGAGCTG                                                            | CCAATTCATCCCGTTTCTG                                        |
| xe3 3' end insertion                        | CCAATTACTCTTCAACATCC                                                            | CGACATTATTGATGTAACACC                                      |
| <b>Probes for Northern blotting</b>         |                                                                                 |                                                            |
| U1                                          | GCACGCAGCCCCGATACGCA                                                            |                                                            |
| U2                                          | CGATAAGAACAGATACTACAC                                                           |                                                            |
| U4                                          | CGCACCTCGCAAAGCCTCA                                                             |                                                            |
| U5                                          | GGTTAAATGCAGAGGAACCAGAGT                                                        |                                                            |

|                  |                                                                 |                     |
|------------------|-----------------------------------------------------------------|---------------------|
| U6               | ATTTGCGTGTCATCCTTGCGCAGG                                        |                     |
| tRNA(gly)        | GCTTGGAAGGCATCCATGCTGACCATT                                     |                     |
|                  |                                                                 |                     |
| <b>3' RACE</b>   |                                                                 |                     |
|                  |                                                                 |                     |
| RT primer        | GACCGAGTGTAGCAAGCGAGGACTCGA<br>GCTCAAGCCAAGCAGAAGACGGCATA<br>GA |                     |
| U6 amplification | GACCGAGTGTAGCAAGCG                                              | GTTCTCCGAGAACATATAC |
